# Supplementary material for: L1CAM from human melanoma carries a novel type of N-glycan with Galβ1-4Galβ1- motif. Involvement of N-linked glycans in migratory and invasive behaviour of melanoma cells
Source: PubMed Central journal article supplement (PMC3606521; doi:10.1007/s10719-012-9374-5), 2012-04-29

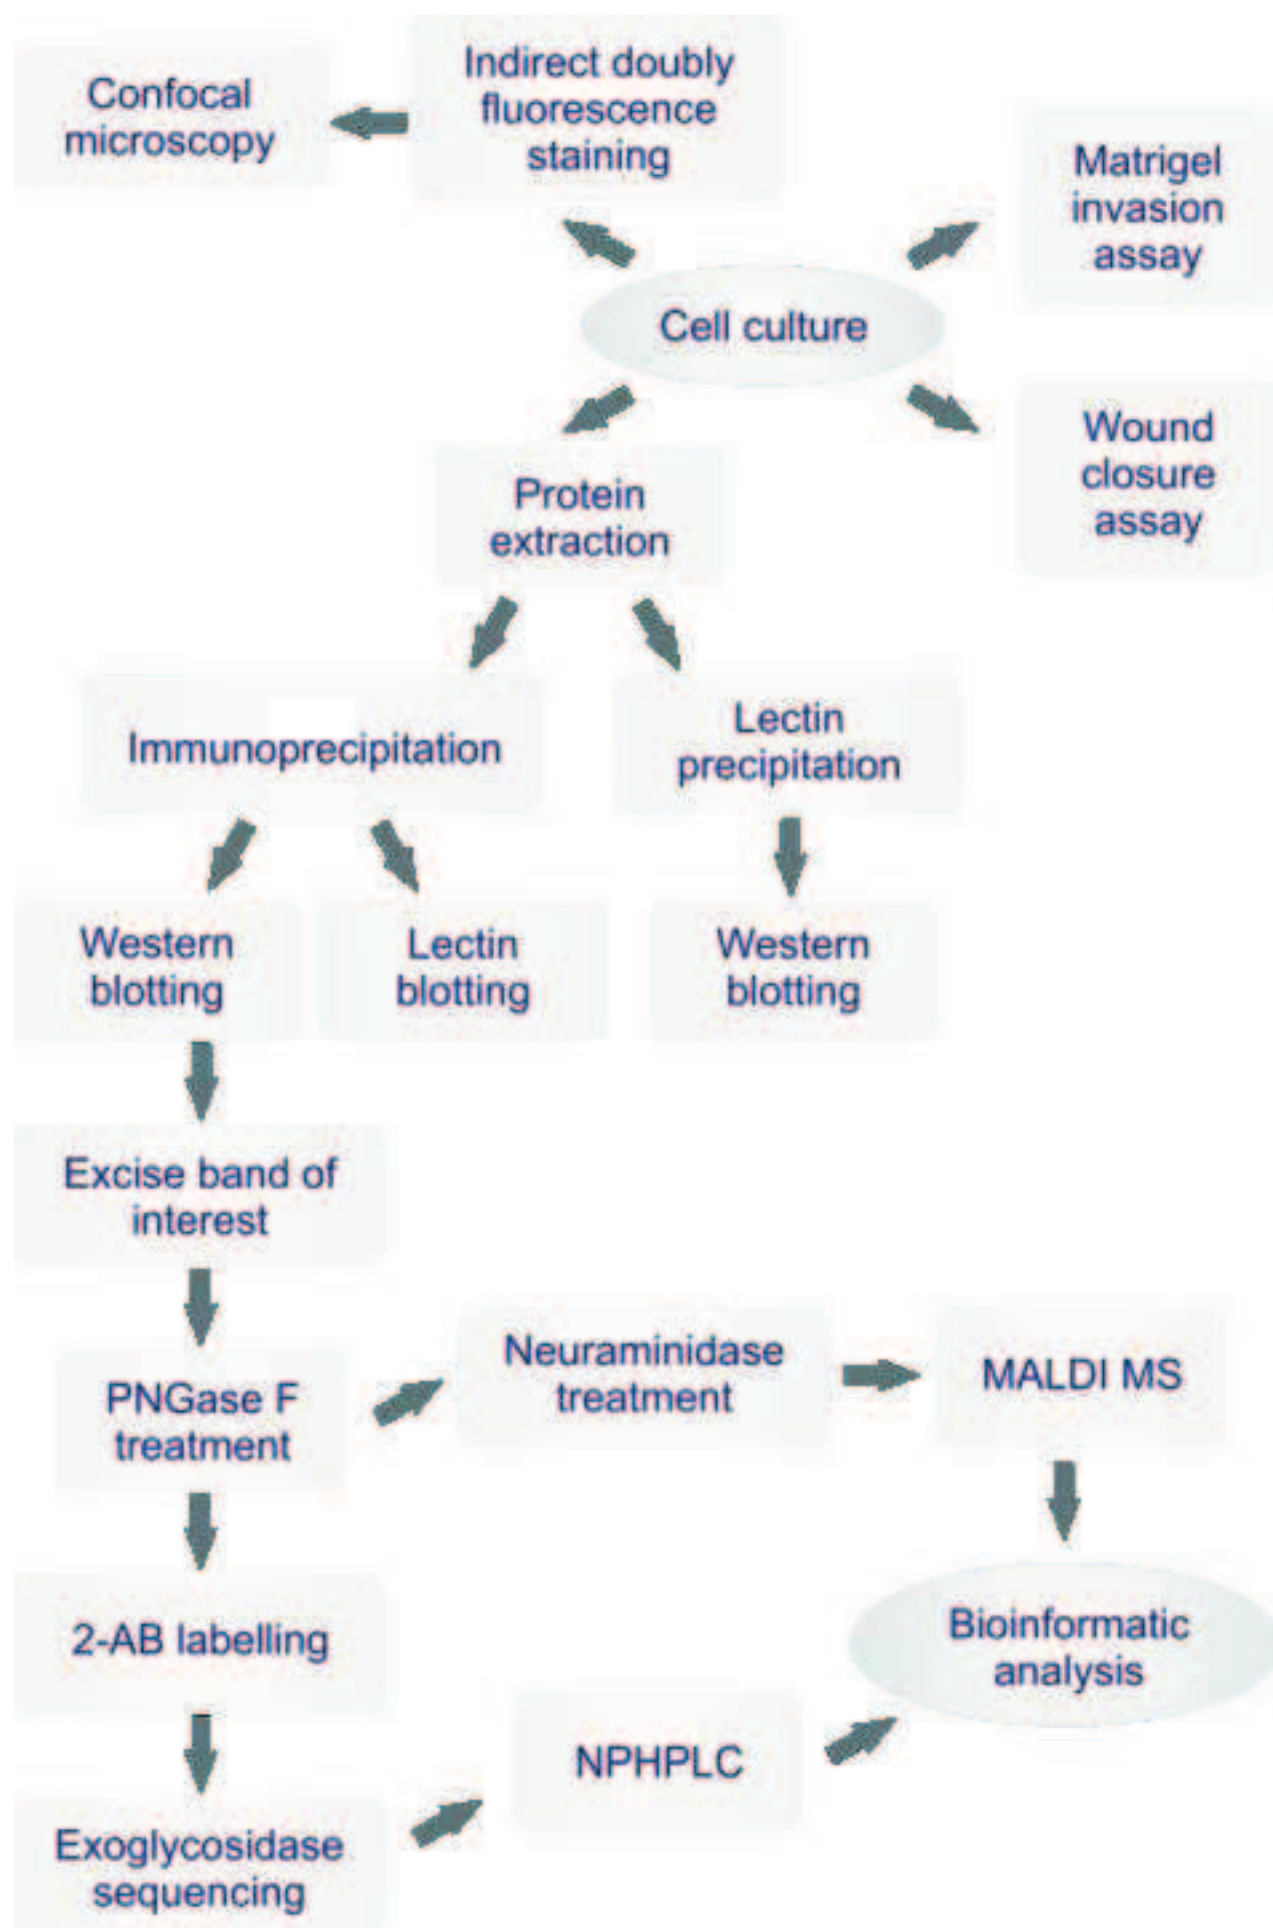

Supplement: 10719_2012_9374_MOESM1_ESM.pdf [file 10719_2012_9374_MOESM1_ESM.pdf]
